# Supplementary material for: The Use of Fitness Influencers’ Websites by Young Adult Women: A Cross-Sectional Study
Source: PubMed Central journal article supplement (PMC7503997; doi:10.3390/ijerph17176360), 2020-09-01
Supplement: ijerph-17-06360-s001.pdf [file ijerph-17-06360-s001.pdf]

**Table S1.** The frequencies of health behaviours in the categories of independent variables used in the multivariate logistic regression models. Part I.

| Variable                         | Categories of the Variable                     | Smoking    |            | E-cigarettes in the Previous 30 days |            | Alcohol Consumption in the Previous 30 Days |            | Breast Self-Examination          |                                |
|----------------------------------|------------------------------------------------|------------|------------|--------------------------------------|------------|---------------------------------------------|------------|----------------------------------|--------------------------------|
|                                  |                                                | yes        | no         | at least once                        | not used   | at least once                               | no use     | more frequently than once yearly | once yearly or less frequently |
| The use of influencers' websites | less often than once weekly                    | 37,2 (271) | 62,8 (458) | 16,3 (119)                           | 83,7 (609) | 41 (299)                                    | 59 (430)   | 27,3 (199)                       | 72,7 (529)                     |
|                                  | more often than once weekly                    | 39,5 (119) | 60,5 (182) | 23,6 (71)                            | 76,4 (230) | 46,2 (139)                                  | 53,8 (162) | 34,2 (103)                       | 65,8 (198)                     |
| Health literacy                  | inadequate                                     | 35.2 (63)  | 64.8 (116) | 20.2 (36)                            | 79.8 (142) | 46.4 (83)                                   | 53.6 (96)  | 23 (41)                          | 77 (137)                       |
|                                  | problematic                                    | 43.3 (77)  | 56.7 (101) | 23.6 (42)                            | 76.4 (136) | 51.1 (91)                                   | 48.9 (87)  | 26.6 (47)                        | 73.4 (130)                     |
|                                  | sufficient                                     | 36.5 (182) | 63.5 (317) | 14.4 (72)                            | 85.6 (427) | 39.5 (197)                                  | 60.5 (302) | 34.9 (174)                       | 65.1 (324)                     |
| Place of residence               | rural                                          | 37.7 (162) | 62.3 (268) | 17 (73)                              | 83 (357)   | 37.7 (162)                                  | 62.3 (268) | 28.6 (123)                       | 71.4 (307)                     |
|                                  | urban <20.000                                  | 34 (34)    | 66 (66)    | 11 (11)                              | 89 (89)    | 39 (39)                                     | 61 (61)    | 30 (30)                          | 70 (70)                        |
|                                  | urban from 20.000 to <100.000                  | 42.1 (93)  | 57.9 (128) | 22.6 (50)                            | 77.4 (171) | 42.1 (93)                                   | 57.9 (128) | 28.4 (63)                        | 71.6 (159)                     |
|                                  | urban from 100.000 to <500.000                 | 40.1 (67)  | 59.9 (100) | 21 (35)                              | 79 (132)   | 48.5 (81)                                   | 51.5 (86)  | 34.1 (57)                        | 65.9 (110)                     |
|                                  | urban from 500.000                             | 30.6 (34)  | 69.4 (77)  | 19.6 (22)                            | 80.4 (90)  | 55.9 (62)                                   | 44.1 (49)  | 26.4 (29)                        | 73.6 (81)                      |
| Net income per household member  | ≤1,000 PLN                                     | 37.2 (100) | 62.8 (169) | 16.8 (45)                            | 83.2 (223) | 38.1 (102)                                  | 61.9 (166) | 25.7 (69)                        | 74.3 (199)                     |
|                                  | 1.000-2.000 PLN                                | 40.2 (143) | 59.8 (213) | 18 (64)                              | 82 (292)   | 40.7 (145)                                  | 59.3 (211) | 33.4 (119)                       | 66.6 (237)                     |
|                                  | >2.000 PLN                                     | 38.1 (93)  | 61.9 (151) | 18 (44)                              | 82 (201)   | 45.5 (111)                                  | 54.5 (133) | 30.3 (74)                        | 69.7 (170)                     |
|                                  | refused to disclose                            | 33.5 (54)  | 66.5 (107) | 23.6 (38)                            | 76.4 (123) | 48.4 (78)                                   | 51.6 (83)  | 25 (40)                          | 75 (120)                       |
| Education level                  | lower than upper secondary                     | 49 (177)   | 51 (185)   | 23 (83)                              | 77 (278)   | 37 (135)                                    | 62.7 (227) | 24 (86)                          | 76 (275)                       |
|                                  | upper secondary or post-secondary non-tertiary | 40 (161)   | 60 (241)   | 20.4 (82)                            | 79.6 (320) | 41.4 (166)                                  | 58.6 (235) | 31 (124)                         | 69 (276)                       |
|                                  | bachelor's degree                              | 14.5 (18)  | 85.5 (106) | 7.3 (9)                              | 92.7 (115) | 53.2 (66)                                   | 46.8 (58)  | 35.5 (44)                        | 64.5 (80)                      |
|                                  | masters' degree or higher                      | 23.9 (34)  | 76.1 (108) | 11.9 (17)                            | 88.1 (126) | 49 (70)                                     | 51 (73)    | 33.1 (47)                        | 66.9 (95)                      |
| Vocational status                | employee                                       | 34.7 (111) | 65.3 (209) | 15.3 (49)                            | 84.7 (271) | 48.1 (154)                                  | 51.9 (166) | 32 (102)                         | 68 (217)                       |
|                                  | self-employed or farmer                        | 34.6 (37)  | 65.4 (70)  | 20.6 (22)                            | 79.4 (85)  | 38.3 (41)                                   | 61.7 (66)  | 34 (36)                          | 66 (70)                        |

|                |                              |            |            |            |            |            |            |            |            |
|----------------|------------------------------|------------|------------|------------|------------|------------|------------|------------|------------|
|                | university or school student | 32.1 (61)  | 67.9 (129) | 31.2 (59)  | 68.8 (130) | 52.4 (99)  | 47.6 (90)  | 23.8 (45)  | 76.2 (144) |
|                | vocationally inactive        | 43.6 (180) | 56.4 (233) | 14.5 (60)  | 85.5 (353) | 34.6 (143) | 65.4 (270) | 28.5 (118) | 71.5 (296) |
| Marital status | singles                      | 40.9 (236) | 59.1 (341) | 21.1 (122) | 78.9 (455) | 47.1 (272) | 52.9 (305) | 27.8 (160) | 72.2 (416) |
|                | other                        | 34 (154)   | 66 (299)   | 15.2 (69)  | 84.8 (384) | 36.5 (165) | 63.5 (287) | 31.3 (142) | 68.7 (311) |

**Table S2.** The frequencies of health behaviours in the categories of independent variables used in the multivariate logistic regression models. Part II.

| Variable                         | Categories of the Variable                     | Physical Activity in the Previous 30 Days |            |               |          | Consumption of Five Portions of Fruits and Vegetables Daily in the Previous 30 Days |            |                                  |                                |
|----------------------------------|------------------------------------------------|-------------------------------------------|------------|---------------|----------|-------------------------------------------------------------------------------------|------------|----------------------------------|--------------------------------|
|                                  |                                                | yes                                       | no         | at least once | not used | at least once                                                                       | no use     | more frequently than once yearly | once yearly or less frequently |
| The use of influencers' websites | less often than once weekly                    | 11,8 (86)                                 | 17,7 (129) | 65,3 (477)    | 5,2 (38) | 14,5 (106)                                                                          | 23,3 (170) | 12,2 (89)                        | 49,9 (364)                     |
|                                  | more often than once weekly                    | 11,9 (36)                                 | 31 (94)    | 54,8 (166)    | 2,3 (7)  | 26,9 (81)                                                                           | 31,2 (94)  | 16,9 (51)                        | 24,9 (75)                      |
| Health literacy                  | inadequate                                     | 8,9 (16)                                  | 20,1 (36)  | 63,7 (114)    | 7,3 (13) | 13,4 (24)                                                                           | 19,6 (35)  | 20,7 (37)                        | 46,4 (83)                      |
|                                  | problematic                                    | 9,6 (17)                                  | 22,6 (40)  | 65 (115)      | 2,8 (5)  | 20,8 (37)                                                                           | 23 (41)    | 9,6 (17)                         | 46,6 (83)                      |
|                                  | sufficient                                     | 14,2 (71)                                 | 23 (115)   | 58,5 (292)    | 4,2 (21) | 19,1 (95)                                                                           | 28,5 (142) | 11,8 (59)                        | 40,6 (202)                     |
| Place of residence               | rural                                          | 11 (47)                                   | 18,4 (79)  | 66,2 (284)    | 4,4 (19) | 18,1 (78)                                                                           | 26,7 (115) | 14 (60)                          | 41,2 (177)                     |
|                                  | urban <20.000                                  | 8,9 (9)                                   | 23,8 (24)  | 62,4 (63)     | 5 (5)    | 19 (19)                                                                             | 31 (31)    | 14 (14)                          | 36 (36)                        |
|                                  | urban from 20.000 to <100.000                  | 12,7 (28)                                 | 24,9 (55)  | 58,4 (129)    | 4,1 (9)  | 16,7 (37)                                                                           | 25,7 (57)  | 14 (31)                          | 43,7 (97)                      |
|                                  | urban from 100.000 to <500.000                 | 12 (20)                                   | 24,6 (41)  | 59,3 (99)     | 4,2 (7)  | 20,4 (34)                                                                           | 19,2 (32)  | 13,2 (22)                        | 47,3 (79)                      |
|                                  | urban from 500.000                             | 14,4 (16)                                 | 21,6 (24)  | 59,5 (66)     | 4,5 (5)  | 17,1 (19)                                                                           | 26,1 (29)  | 11,7 (13)                        | 45 (50)                        |
| Net income per household member  | ≤1,000 PLN                                     | 11,5 (31)                                 | 16,3 (44)  | 65,9 (178)    | 6,3 (17) | 17,9 (48)                                                                           | 22 (59)    | 14,6 (39)                        | 45,5 (122)                     |
|                                  | 1.000-2.000 PLN                                | 12,1 (43)                                 | 24,4 (87)  | 60,4 (215)    | 3,1 (11) | 16,3 (58)                                                                           | 25,4 (90)  | 13,5 (48)                        | 44,8 (159)                     |
|                                  | >2.000 PLN                                     | 11 (27)                                   | 24,1 (59)  | 62,4 (153)    | 2,4 (6)  | 21,7 (53)                                                                           | 29,1 (71)  | 14,3 (35)                        | 34,8 (85)                      |
|                                  | refused to disclose                            | 12,5 (20)                                 | 20,6 (33)  | 60 (96)       | 6,9 (11) | 17,4 (28)                                                                           | 27,3 (44)  | 10,6 (17)                        | 44,7 (72)                      |
| Education level                  | lower than upper secondary                     | 12 (43)                                   | 20 (71)    | 63 (228)      | 5 (19)   | 16 (59)                                                                             | 25 (90)    | 15 (55)                          | 43 (157)                       |
|                                  | upper secondary or post-secondary non-tertiary | 11,4 (46)                                 | 20,4 (82)  | 63,9 (257)    | 4,2 (17) | 17,7 (71)                                                                           | 26,6 (107) | 12,2 (49)                        | 43,5 (175)                     |
|                                  | bachelor's degree                              | 9,6 (12)                                  | 26,4 (33)  | 62,4 (78)     | 1,6 (2)  | 19,4 (24)                                                                           | 20,2 (25)  | 17,7 (22)                        | 42,7 (53)                      |
|                                  | masters' degree or higher                      | 14,7 (21)                                 | 25,9 (37)  | 55,2 (79)     | 4,2 (6)  | 23,8 (34)                                                                           | 29,4 (42)  | 9,1 (13)                         | 37,8 (54)                      |
| Vocational status                | employee                                       | 12,2 (39)                                 | 22,5 (72)  | 60,6 (194)    | 4,7 (15) | 20,9 (67)                                                                           | 26,6 (85)  | 13,8 (44)                        | 38,8 (124)                     |
|                                  | self-employed or farmer                        | 10,4 (11)                                 | 21,7 (23)  | 66 (70)       | 1,9 (2)  | 22,4 (24)                                                                           | 29,9 (32)  | 15 (16)                          | 32,7 (35)                      |

|                |                              |           |            |            |          |            |            |           |            |
|----------------|------------------------------|-----------|------------|------------|----------|------------|------------|-----------|------------|
|                | university or school student | 9,9 (19)  | 29,3 (56)  | 58,1 (111) | 2,6 (5)  | 15,3 (29)  | 18,9 (36)  | 13,2 (25) | 52,6 (100) |
|                | vocationally inactive        | 12,3 (51) | 17,4 (72)  | 64,6 (267) | 5,6 (23) | 16,4 (68)  | 27,1 (112) | 13,3 (55) | 43,2 (179) |
| Marital status | singles                      | 12,7 (73) | 22,9 (132) | 60,3 (348) | 4,2 (24) | 17,7 (102) | 22,7 (131) | 13 (75)   | 46,5 (268) |
|                | other                        | 10,6 (48) | 20,1 (91)  | 64,7 (293) | 4,6 (21) | 18,9 (86)  | 29,3 (133) | 14,3 (65) | 37,4 (170) |
